# Supplementary material
Source: publisher figshare collection journal article supplement (https://karger.figshare.com/ndownloader/files/38890674)
Supplement: Supplementary file 1 [file 38890674]

Supplementary video S1. 3D mapping of the predictions by MNet

MNet probabilistically predicted each subject as HV, AD, DLB, or iNPH, generating the posterior probability vector , where is a subject and . Based on the first three dimensions of posterior probabilities, subject samples were scatter-plotted in a three-dimensional space. The colors of the plots show the ground truth label on subjects tagged by experts.
